# Supplementary material for: Chitosan Films Functionalized with Different Hydroxycinnamic Acids: Preparation, Characterization and Application for Pork Preservation
Source: PubMed Central journal article supplement (PMC8000987; doi:10.3390/foods10030536), 2021-03-05
Supplement: foods-10-00536-s001.pdf [file foods-10-00536-s001.pdf]

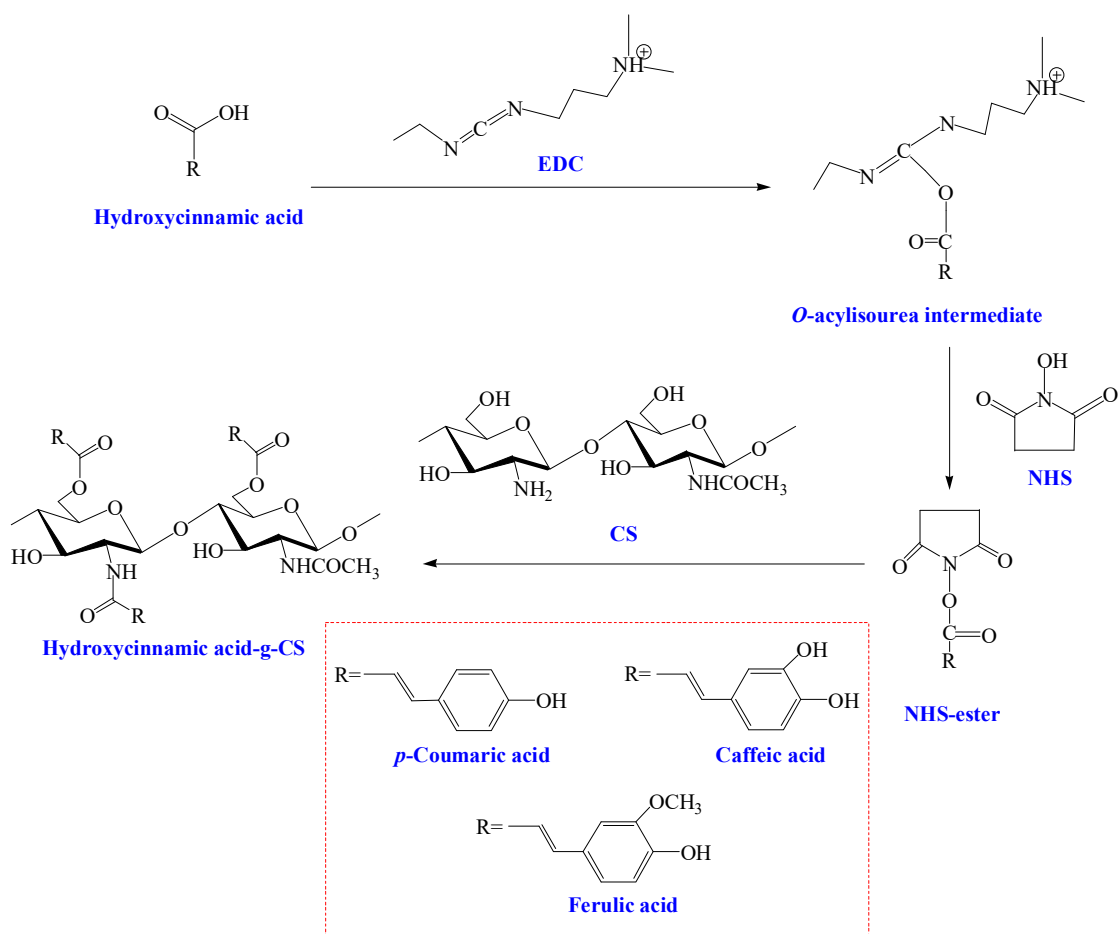

**Figure S1.** Synthetic mechanisms of hydroxycinnamic acid-g-CSs by EDC/NHS mediated coupling.

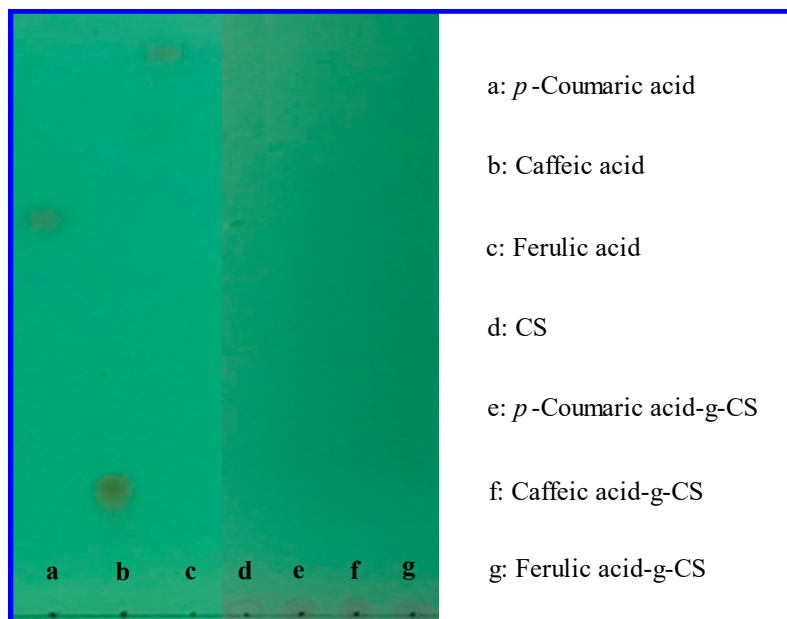

**Figure S2.** TLC of chitosan (CS) and different hydroxycinnamic acid-g-CSs.
